# Supplementary material for: Short-Term Impact of Low-Intensity Exercise with Blood Flow Restriction on Mild Knee Osteoarthritis in Older Adults: A Pilot Study
Source: MDPI journal article supplement (doi:10.3390/healthcare12030308), 2024-01-25
Supplement: s1 [file s1]

|                | Timed up-and-go             |         |            | Sit-to-stand               |         |            | Skeletal muscle index      |         |            | Hand grip strength (Right) |         |            | Hand grip strength (Left) |         |            |
|----------------|-----------------------------|---------|------------|----------------------------|---------|------------|----------------------------|---------|------------|----------------------------|---------|------------|---------------------------|---------|------------|
|                | F                           | p-value | parital η2 | F                          | p-value | parital η2 | F                          | p-value | parital η2 | F                          | p-value | parital η2 | F                         | p-value | parital η2 |
| Adjusted model | 5.177                       | 0.016   | 0.742      | 3.279                      | 0.001   | 0.863      | 328.380                    | 0.000   | 0.995      | 38.608                     | 0.000   | 0.955      | 37.001                    | 0.000   | 0.954      |
| Pre-exercise   | 22.746                      | 0.001   | 0.717      | 26.584                     | 0.001   | 0.747      | 407.768                    | 0.000   | 0.978      | 86.684                     | 0.000   | 0.906      | 77.112                    | 0.000   | 0.895      |
| Gender         | 1.587                       | 0.239   | 0.150      | 0.759                      | 0.406   | 0.078      | 0.047                      | 0.833   | 0.005      | 0.015                      | 0.904   | 0.002      | 0.110                     | 0.748   | 0.012      |
| Age            | 0.913                       | 0.364   | 0.092      | 2.305                      | 0.163   | 0.204      | 2.853                      | 0.125   | 0.241      | 0.377                      | 0.554   | 0.040      | 2.934                     | 0.121   | 0.246      |
| BMI            | 0.174                       | 0.686   | 0.019      | 7.622                      | 0.022   | 0.459      | 0.294                      | 0.601   | 0.032      | 1.015                      | 0.340   | 0.101      | 12.310                    | 0.007   | 0.578      |
| KL-grade       | 0.067                       | 0.802   | 0.007      | 0.235                      | 0.639   | 0.025      | 1.902                      | 0.201   | 0.174      | 0.233                      | 0.641   | 0.025      | 0.015                     | 0.906   | 0.002      |
|                |                             |         |            |                            |         |            |                            |         |            |                            |         |            |                           |         |            |
|                |                             |         |            |                            |         |            |                            |         |            |                            |         |            |                           |         |            |
|                | Thigh circumference (Right) |         |            | Thigh circumference (Left) |         |            | Calf circumferemce (Right) |         |            | Calf circumferemce (Left)  |         |            |                           |         |            |
|                | F                           | p-value | parital η2 | F                          | p-value | parital η2 | F                          | p-value | parital η2 | F                          | p-value | parital η2 |                           |         |            |
| Adjusted model | 76.868                      | 0.000   | 0.977      | 81.902                     | 0.000   | 0.798      | 25.520                     | 0.000   | 0.934      | 48.440                     | 0.000   | 0.964      |                           |         |            |
| Pre-exercise   | 209.995                     | 0.000   | 0.959      | 201.785                    | 0.000   | 0.951      | 3.970                      | 0.077   | 0.306      | 34.063                     | 0.000   | 0.791      |                           |         |            |
| Gender         | 2.917                       | 0.122   | 0.245      | 2.032                      | 0.188   | 0.184      | 5.212                      | 0.048   | 0.367      | 0.102                      | 0.757   | 0.011      |                           |         |            |
| Age            | 1.453                       | 0.259   | 0.139      | 0.218                      | 0.652   | 0.024      | 8.080                      | 0.019   | 0.473      | 0.385                      | 0.550   | 0.041      |                           |         |            |
| BMI            | 0.058                       | 0.815   | 0.006      | 0.000                      | 0.994   | 0.000      | 27.954                     | 0.001   | 0.756      | 0.139                      | 0.718   | 0.015      |                           |         |            |
| KL-grade       | 1.479                       | 0.255   | 0.141      | 0.005                      | 0.946   | 0.001      | 6.200                      | 0.034   | 0.408      | 0.245                      | 0.633   | 0.026      |                           |         |            |
